# Supplementary material for: Proteasomal degradation restricts the nuclear lifespan of AID
Source: PubMed Central journal article supplement — J Exp Med. 2008 Jun 9;205(6):1357–68. doi: 10.1084/jem.20070950 (PMC2413033; doi:10.1084/jem.20070950), 2008-06-09
Supplement: jem.20070950_5.pdf [file jem.20070950_5.pdf]

**Table S1.** Mutation frequency at the endogenous V4-39 locus of BL2 clones transfected with WT-AID-EGFP- or mutNES-AID-EGFP-inducible expression vectors<sup>a</sup>

| Clone name            | Number of mutations/ |                       |
|-----------------------|----------------------|-----------------------|
|                       | number of sequences  | Mutation frequency    |
| WT-6                  | 15/53                | $0.73 \times 10^{-3}$ |
| WT-14                 | 16/54                | $0.76 \times 10^{-3}$ |
| WT-24                 | 13/65                | $0.51 \times 10^{-3}$ |
| Mean of WT clones     |                      | $0.67 \times 10^{-3}$ |
| mutNES-5              | 30/72                | $1.07 \times 10^{-3}$ |
| mutNES-16             | 69/72                | $2.39 \times 10^{-3}$ |
| mutNES-42             | 19/45                | $1.08 \times 10^{-3}$ |
| Mean of mutNES clones |                      | $1.51 \times 10^{-3}$ |

<sup>a</sup>390 bp of the rearranged V4-39-J<sub>H</sub>4 sequence were determined.
